# Supplementary material for: Can Clinical Assessment of Postural Control Explain Locomotive Body Function, Mobility, Self-Care and Participation in Children with Cerebral Palsy?
Source: MDPI journal article supplement (doi:10.3390/healthcare12010098), 2024-01-01
Supplement: s1 [file s1]

| Supplementary Table S1. Locomotor Stages (LS)                                                                                                                                                                                                                                                                       |                                                                                         |
|---------------------------------------------------------------------------------------------------------------------------------------------------------------------------------------------------------------------------------------------------------------------------------------------------------------------|-----------------------------------------------------------------------------------------|
| Pathologic Locomotor Stages                                                                                                                                                                                                                                                                                         | Ontogenetic Locomotor Stages                                                            |
| <b>STAGE 0: ORIENTATION.</b> The child's motor performance is lower than in stage 1. In the supine position the child cannot grasp or turn its head or body in order to establish a contact.                                                                                                                        | Holokinetic movement                                                                    |
| <b>STAGE 1: REACHING.</b> The child can turn his head and body towards a stimuli, and at least one hand tries to reach out with palmar flexion and cubital tilt. Grasping is restricted to the finger tips.                                                                                                         | Reach out with hands towards toy. 4 month                                               |
| <b>STAGE 2: GRASPING.</b> In prone position                                                                                                                                                                                                                                                                         | Prone on forearms, weight on one side and able to grasp with the other hand. 4,5 months |
| <b>STAGE 3: CREEPING.</b> Child is able to move forward propping on one or both forearms. Legs may move in association, but are not able to push to create any locomotion.                                                                                                                                          | Creeping or commando crawling. 7 months                                                 |
| <b>STAGE 4: HOMOLOGOUS CRAWLING.</b> Bunny hopping. Legs move forward at the same time, while arms can do it in a homologous or alternating way.                                                                                                                                                                    | No analogy                                                                              |
| <b>STAGE 5: RECIPROCAL CRAWLING.</b> Crawling on knees and open hands with a cyclic and sinusoidal shift of the centre of gravity around the midline. All extremities step forward alternating in a crossed pattern. This pattern is used by the child independently, without being told and when it moves quickly. | Reciprocal crawling. 9 months.                                                          |
| <b>STAGE 6: CRUISING.</b> The child can pull to a stand and walk sideways independently by holding onto furniture with his hands. Pull to stand may already appears at stage 3, but the child cannot step sideways.                                                                                                 | Sideways walking/ cruising on the furniture. 12 -13 months                              |
| <b>STAGE 7: INDEPENDENT WALKING.</b> The child can walk forward and stop without holding on. Walking is the everyday preferred locomotion.                                                                                                                                                                          | Walking, stop and turn without holding on. 15 months                                    |
| <b>STAGE 8: UNILATERAL STANCE ON ONE SIDE.</b> The child can stand during 3 seconds or more only on one preferred side, left or right foot. The examiner must not demonstrate this test, but give instructions: "lift one knee up towards your belly"                                                               | Single Leg stance on right or left foot. 3 years                                        |
| <b>STAGE 9: RECIPROCAL UNILATERAL STANCE.</b> The child is able to stand reciprocally during 3 seconds or more on both sides, right and left. The examiner gives the same instruction as in stage 8.                                                                                                                | Single Leg stance on right and left foot. 4 years                                       |
